# Supplementary material for: The Significance of Fibrosis Quantification as a Marker in Assessing Pseudo-Capsule Status and Clear Cell Renal Cell Carcinoma Prognosis
Source: PubMed Central journal article supplement (PMC7692106; doi:10.3390/diagnostics10110895), 2020-11-02
Supplement: diagnostics-10-00895-s001.pdf [file diagnostics-10-00895-s001.pdf]

Supplementary Materials

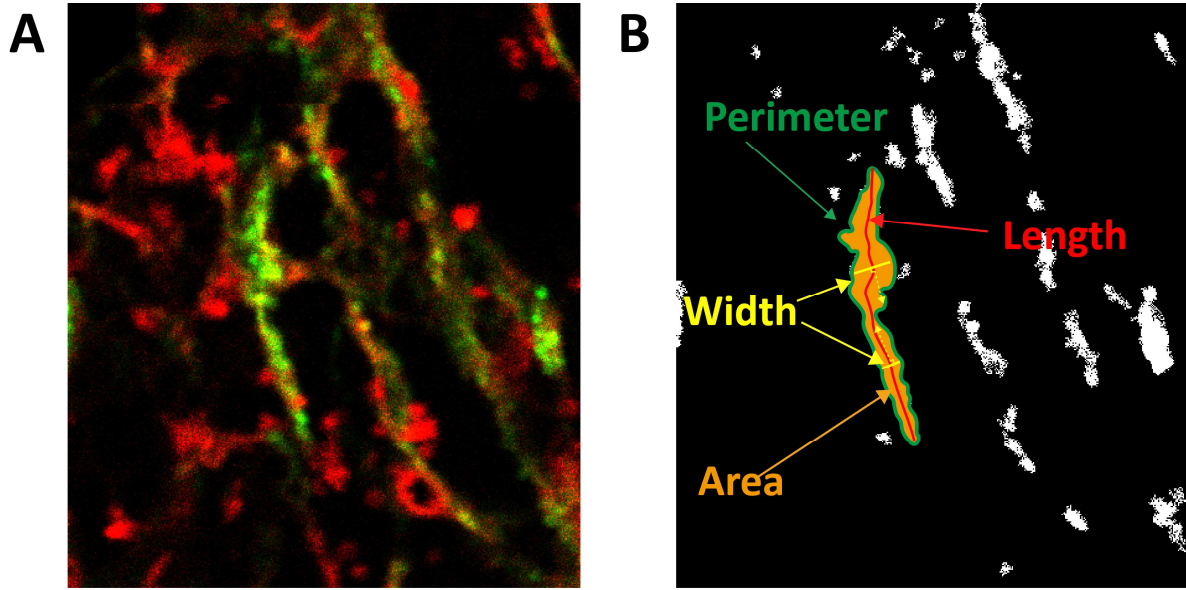

**Figure S1** (A) SHG/TPEF image, (B) illustrations of width, length, perimeter and area of a collagen fiber.

**Table S1.** Intratumoral fibrosis in different groups classified by clinicopathological parameters

| features               | No. | CPA<br>(Median±IQR) | P<br>value | AggCPA<br>(Median±IQR) | P<br>value | DisCPA<br>(Median±IQR) | P<br>value |
|------------------------|-----|---------------------|------------|------------------------|------------|------------------------|------------|
| Gender                 |     |                     |            |                        |            |                        |            |
| Male                   | 54  | 1.71±2.74           | 0.669      | 1.18±2.45              | 0.772      | 0.19±0.36              | 0.466      |
| Female                 | 19  | 1.12±2.20           |            | 0.80±1.67              |            | 0.17±0.34              |            |
| Age                    |     |                     |            |                        |            |                        |            |
| ≤58                    | 39  | 1.69±2.67           | 0.167      | 1.23±2.36              | 0.207      | 0.20±0.36              | 0.167      |
| >58                    | 34  | 1.26±2.93           |            | 0.79±2.55              |            | 0.17±0.36              |            |
| Fuhrman grade          |     |                     |            |                        |            |                        |            |
| G1+2                   | 54  | 1.82±2.74           | 0.615      | 1.20±2.44              | 0.563      | 0.18±0.33              | 0.624      |
| G3+4                   | 19  | 1.51±2.33           |            | 0.92±1.72              |            | 0.17±0.47              |            |
| Clinical Stage         |     |                     |            |                        |            |                        |            |
| I+II                   | 47  | 2.30±3.70           | 0.007      | 1.80±3.14              | 0.003      | 0.20±0.34              | 0.534      |
| III+IV                 | 26  | 1.05±1.76           |            | 0.56±1.13              |            | 0.15±0.37              |            |
| Tumor Size             |     |                     |            |                        |            |                        |            |
| ≤4cm                   | 47  | 1.06±2.75           | 0.040      | 2.05±3.35              | 0.039      | 0.23±0.29              | 0.007      |
| >4cm                   | 26  | 2.35±3.02           |            | 3.24±5.41              |            | 0.37±0.29              |            |
| Histologic<br>Necrosis |     |                     |            |                        |            |                        |            |
| Absent                 | 54  | 1.23±2.73           | 0.227      | 0.92±2.42              | 0.274      | 0.14±0.35              | 0.030      |
| Present                | 19  | 1.96±2.42           |            | 1.35±2.60              |            | 0.27±0.43              |            |

**Table S2.** PS fibrosis in different groups classified by clinicopathological parameters

| features | No. | CPA<br>(Median±IQR) | P<br>value | AggCPA<br>(Median±IQR) | P<br>value | DisCPA<br>(Median±IQR) | P<br>value |
|----------|-----|---------------------|------------|------------------------|------------|------------------------|------------|
| Gender   |     |                     |            |                        |            |                        |            |
| Male     | 54  | 17.91±8.57          | 0.421      | 15.18±8.85             | 0.530      | 1.88±1.05              | 0.069      |
| Female   | 19  | 16.50±14.68         |            | 14.29±12.85            |            | 1.46±0.79              |            |
| Age      |     |                     |            |                        |            |                        |            |
| ≤58      | 39  | 19.39±8.06          | 0.029      | 16.09±10.30            | 0.043      | 1.76±0.94              | 0.588      |

|                     |    |             |       |             |       |           |       |
|---------------------|----|-------------|-------|-------------|-------|-----------|-------|
| >58                 | 34 | 16.50±9.98  |       | 13.61±9.84  |       | 1.68±1.20 |       |
| Fuhrman grade       |    |             |       |             |       |           |       |
| G1+2                | 54 | 17.50±12.19 | 0.990 | 14.71±11.92 | 0.753 | 1.52±0.88 | 0.004 |
| G3+4                | 19 | 18.41±8.27  |       | 15.22±8.29  |       | 2.10±1.11 |       |
| Clinical Stage      |    |             |       |             |       |           |       |
| I+II                | 47 | 19.09±7.93  | 0.003 | 15.78±8.13  | 0.003 | 1.53±0.97 | 0.041 |
| III+IV              | 26 | 14.13±9.51  |       | 10.81±8.55  |       | 1.98±0.90 |       |
| Tumor Size          |    |             |       |             |       |           |       |
| ≤4cm                | 47 | 18.07±9.66  | 0.712 | 15.02±9.29  | 0.519 | 1.61±0.91 | 0.044 |
| >4cm                | 26 | 17.24±10.31 |       | 14.50±10.72 |       | 2.00±0.94 |       |
| Histologic Necrosis |    |             |       |             |       |           |       |
| Absent              | 54 | 17.70±10.12 | 0.860 | 14.87±9.86  | 0.725 | 1.61±0.86 | 0.159 |
| Present             | 19 | 18.76±10.91 |       | 15.34±11.86 |       | 1.96±1.27 |       |
